# Supplementary material for: Association between Arsenic Exposure from Drinking Water and Longitudinal Change in Blood Pressure among HEALS Cohort Participants
Source: PubMed Central journal article supplement (PMC4529016; doi:10.1289/ehp.1409004), 2015-03-27
Supplement: ehp.1409004.s001.acco.pdf [file ehp.1409004.s001.acco.pdf]

**Note to Readers:** *EHP* strives to ensure that all journal content is accessible to all readers. However, some figures and Supplemental Material published in *EHP* articles may not conform to 508 standards due to the complexity of the information being presented. If you need assistance accessing journal content, please contact [ehp508@niehs.nih.gov](mailto:ehp508@niehs.nih.gov). Our staff will work with you to assess and meet your accessibility needs within 3 working days.

## **Supplemental Material**

### **Association between Arsenic Exposure from Drinking Water and Longitudinal Change in Blood Pressure among HEALS Cohort Participants**

Jieying Jiang, Mengling Liu, Faruque Parvez, Binhuan Wang, Fen Wu, Mahbub Eunos, Sripal Bangalore, Jonathan D. Newman, Alauddin Ahmed, Tariqul Islam, Muhammad Rakibuz-Zaman, Rabiul Hasan, Golam Sarwar, Diane Levy, Vesna Slavkovich, Maria Argos, Molly Scannell Bryan, Shohreh F. Farzan, Richard B. Hayes, Joseph H. Graziano, Habibul Ahsan, and Yu Chen

#### **Table of Contents**

Details on arsenic exposure in the population

References

Table S1. Demographic, lifestyle factors and arsenic exposure variables in the overall and study populations.

Table S2. Relation of baseline water arsenic, baseline urinary creatinine-adjusted arsenic and adjusted annual changes in BP within 7 years, by tertiles of arsenic exposure.

Table S3. Relation of baseline water arsenic, baseline urinary creatinine-adjusted arsenic and adjusted annual changes in BP within 7 years, by quintiles of arsenic exposure.

Figure S1. Adjusted means of blood pressure at the third visit by quartiles of baseline arsenic in water or urine. \*  $P < .001$  when compared with reference group (Q1). Model was adjusted for baseline age, sex, baseline BMI, baseline smoking status, baseline educational status and history of diabetes.

## **Details on arsenic exposure in the population**

Wells shared by one to six participants comprised 86% of the overall HEALS participants (N = 10,494), and no more than 14 individuals were recruited from any given well (Ahsan et al. 2006). Well arsenic was the main exposure in the population. Well-water arsenic was correlated with total urinary arsenic, urinary dimethylarsinic acid (DMA), and urinary monomethylarsonic acid (MMA) concentration in our study population (of 0.70, 0.61, and 0.57, respectively) and therefore was clearly the primary source of arsenic in the urine (Chen et al. 2010). While inorganic forms of arsenic found in rice may also contribute total arsenic exposure measured by urinary arsenic, the correlation between rice consumption and total urinary arsenic was weak in our population ( $\rho = 0.03$ ) (Chen et al. 2010).

Arsenic exposure level remained similar in the majority of the population. The average level of urinary creatinine-adjusted arsenic was 285  $\mu\text{g/g}$  at baseline, 224  $\mu\text{g/g}$  at follow-up 1, 220  $\mu\text{g/g}$  at follow-up 2, and 210  $\mu\text{g/g}$  at follow-up 3. Overall, total urinary creatinine-adjusted arsenic decreased by an average of 61  $\mu\text{g/g}$  from baseline to first follow-up and then essentially remained stable with an average decrease of 7  $\mu\text{g/g}$  from first to third follow-up. The correlation of baseline urinary creatinine-adjusted arsenic with urinary arsenic measured at each of the three follow-up visits were all around 0.60.

## **References**

- Ahsan H, Chen Y, Parvez F, Argos M, Hussain AI, Momotaj H, et al. 2006. Health effects of arsenic longitudinal study (heals): Description of a multidisciplinary epidemiologic investigation. *J Expo Sci Environ Epidemiol* 16:191-205.
- Chen Y, Ahsan H, Slavkovich V, Peltier GL, Gluskin RT, Parvez F, et al. 2010. No association between arsenic exposure from drinking water and diabetes mellitus: A cross-sectional study in bangladesh. *Environ Health Perspect* 118:1299-1305.

Table S1. Demographic, lifestyle factors and arsenic exposure variables in the overall and study populations.

| Characteristics                             | Overall population |                    | Study population |                    |
|---------------------------------------------|--------------------|--------------------|------------------|--------------------|
|                                             | No.                | Mean $\pm$ SD or % | No.              | Mean $\pm$ SD or % |
| <b>Age, years</b>                           | 11746              | 37.1 $\pm$ 10.1    | 10853            | 36.8 $\pm$ 10.0    |
| <b>Male , %</b>                             | 5042               | 42.9               | 4588             | 42.3               |
| <b>Ever smoker , %</b>                      | 4172               | 35.5               | 3788             | 34.9               |
| <b>Diabetes history , %</b>                 | 241                | 2.1                | 203              | 1.9                |
| <b>Education, years</b>                     | 11740              | 3.5 $\pm$ 3.8      | 10853            | 3.4 $\pm$ 3.8      |
| <b>BMI baseline, kg/m<sup>2</sup></b>       | 11467              | 19.8 $\pm$ 3.2     | 10791            | 19.7 $\pm$ 3.1     |
| <b>Systolic Blood Pressure, mmHg</b>        |                    |                    |                  |                    |
| Baseline                                    | 11487              | 114.7 $\pm$ 17.9   | 10853            | 113.8 $\pm$ 16.8   |
| Follow up 1                                 | 11130              | 114.6 $\pm$ 17.9   | 10577            | 113.8 $\pm$ 17.1   |
| Follow up 2                                 | 10753              | 119.0 $\pm$ 16.8   | 10013            | 117.9 $\pm$ 15.4   |
| Follow up 3                                 | 10590              | 113.0 $\pm$ 16.7   | 9553             | 111.4 $\pm$ 15.4   |
| <b>Diastolic Blood Pressure, mmHg</b>       |                    |                    |                  |                    |
| Baseline                                    | 11481              | 74.0 $\pm$ 11.8    | 10846            | 73.4 $\pm$ 11.3    |
| Follow up 1                                 | 11130              | 73.3 $\pm$ 10.6    | 10577            | 72.9 $\pm$ 10.2    |
| Follow up 2                                 | 10754              | 76.8 $\pm$ 10.5    | 10013            | 76.2 $\pm$ 10.0    |
| Follow up 3                                 | 10590              | 73.9 $\pm$ 10.6    | 9553             | 73.1 $\pm$ 10.1    |
| <b>Water arsenic, <math>\mu</math>g/L</b>   |                    |                    |                  |                    |
| Baseline                                    | 11746              | 101.5 $\pm$ 115.4  | 10853            | 101.7 $\pm$ 115.7  |
| Follow up 1                                 | 9405               | 62.8 $\pm$ 91.4    | 8940             | 63.2 $\pm$ 91.9    |
| Follow up 2                                 | 8816               | 52.6 $\pm$ 80.9    | 8386             | 53.2 $\pm$ 81.6    |
| Follow up 3                                 | 7140               | 50.7 $\pm$ 78.4    | 6798             | 51.1 $\pm$ 79.1    |
| <b>Urinary arsenic, <math>\mu</math>g/L</b> |                    |                    |                  |                    |
| Baseline                                    | 11224              | 137.7 $\pm$ 156.9  | 10549            | 138.7 $\pm$ 158.4  |
| Follow up 1                                 | 11109              | 122.1 $\pm$ 137.9  | 10558            | 122.8 $\pm$ 139.4  |
| Follow up 2                                 | 10762              | 118.7 $\pm$ 132.8  | 10244            | 119.0 $\pm$ 133.0  |
| Follow up 3                                 | 10562              | 102.7 $\pm$ 116.8  | 10057            | 102.6 $\pm$ 116.9  |

Table S2. Relation of baseline water arsenic, baseline urinary creatinine-adjusted arsenic and adjusted annual changes in BP within 7 years, by tertiles of arsenic exposure.

| <b>Baseline water arsenic<br/>(µg/L) N=10,853</b>                                  | <b>T1<br/>&lt;25</b>  | <b>T2<br/>25-114</b>  | <b>T3<br/>&gt;114</b> |
|------------------------------------------------------------------------------------|-----------------------|-----------------------|-----------------------|
| <b>SBP</b>                                                                         | Change/year (mmHg)    | Change/year (mmHg)    | Change/year (mmHg)    |
| Model 3 <sup>a</sup>                                                               | Ref.                  | 0.49 (0.37,0.60)      | 0.45 (0.33,0.57)      |
| <b>DBP</b>                                                                         |                       |                       |                       |
| Model 3 <sup>a</sup>                                                               | Ref.                  | 0.38 (0.29,0.46)      | 0.31 (0.22,0.39)      |
| <b>Baseline urinary creatinine-adjusted<br/>arsenic (µg/g creatinine) N=10,549</b> | <b>T1<br/>&lt;134</b> | <b>T2<br/>134-285</b> | <b>T3<br/>&gt;285</b> |
| <b>SBP</b>                                                                         | Change/year (mmHg)    | Change/year (mmHg)    | Change/year (mmHg)    |
| Model 3 <sup>a</sup>                                                               | Ref.                  | 0.32 (0.20,0.44)      | 0.36 (0.24,0.48)      |
| <b>DBP</b>                                                                         |                       |                       |                       |
| Model 3 <sup>a</sup>                                                               | Ref.                  | 0.29 (0.21,0.38)      | 0.37 (0.28,0.45)      |

Abbreviations: BP, blood pressure; SBP: systolic blood pressure, DBP: diastolic blood pressure, T1, tertile 1; T2, tertile 2; T3, tertile 3

<sup>a</sup>Controlled for baseline age, sex, BMI, smoking status, educational status, history of diabetes and change of urinary creatinine-adjusted arsenic since baseline.

Table S3. Relation of baseline water arsenic, baseline urinary creatinine-adjusted arsenic and adjusted annual changes in BP within 7 years, by quintiles of arsenic exposure.

| <b>Baseline water arsenic<br/>(µg/L) N=10,853</b>                                       | <b>Q1<br/>&lt;7</b>  | <b>Q2<br/>7-39</b>   | <b>Q3<br/>39-91</b>   | <b>Q4<br/>91-179</b>  | <b>Q5<br/>&gt;179</b> |
|-----------------------------------------------------------------------------------------|----------------------|----------------------|-----------------------|-----------------------|-----------------------|
| <b>SBP</b>                                                                              | Change/year (mmHg)   | Change/year (mmHg)   | Change/year (mmHg)    | Change/year (mmHg)    | Change/year (mmHg)    |
| Model 3 <sup>a</sup>                                                                    | Ref.                 | 0.32 (0.17,0.48)     | 0.56 (0.41,0.72)      | 0.55 (0.40,0.70)      | 0.48 (0.33,0.63)      |
| <b>DBP</b>                                                                              |                      |                      |                       |                       |                       |
| Model 3 <sup>a</sup>                                                                    | Ref.                 | 0.31 (0.21,0.42)     | 0.44 (0.33,0.54)      | 0.36 (0.26,0.47)      | 0.45 (0.35,0.55)      |
| <b>Baseline urinary creatinine-<br/>adjusted arsenic<br/>(µg/g creatinine) N=10,549</b> | <b>Q1<br/>&lt;91</b> | <b>Q2<br/>91-160</b> | <b>Q3<br/>160-248</b> | <b>Q4<br/>248-409</b> | <b>Q5<br/>&gt;409</b> |
| <b>SBP</b>                                                                              | Change/year (mmHg)   | Change/year (mmHg)   | Change/year (mmHg)    | Change/year (mmHg)    | Change/year (mmHg)    |
| Model 3 <sup>a</sup>                                                                    | Ref.                 | 0.25 (0.10,0.40)     | 0.37 (0.22,0.53)      | 0.45 (0.30,0.60)      | 0.41 (0.26,0.56)      |
| <b>DBP</b>                                                                              |                      |                      |                       |                       |                       |
| Model 3 <sup>a</sup>                                                                    | Ref.                 | 0.31 (0.20,0.41)     | 0.39 (0.28,0.50)      | 0.42 (0.32,0.53)      | 0.49 (0.39,0.60)      |

Abbreviations: BP, blood pressure; SBP: systolic blood pressure, DBP: diastolic blood pressure, Q1, quintile 1; Q2, quintile 2; Q3, quintile 3; Q4 quintile 4; Q5 quintile 5.

<sup>a</sup>Controlled for baseline age, sex, BMI, smoking status, educational status, history of diabetes and change of urinary creatinine-adjusted arsenic since baseline.

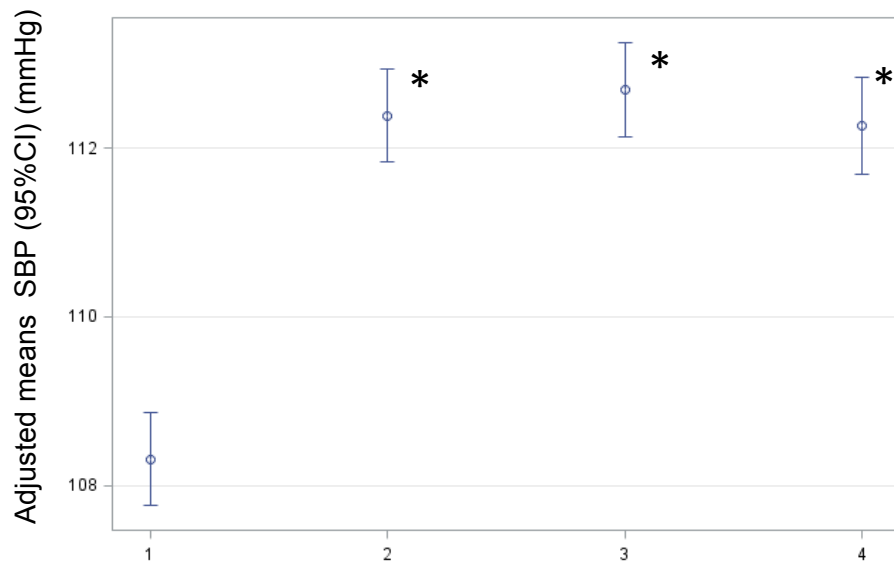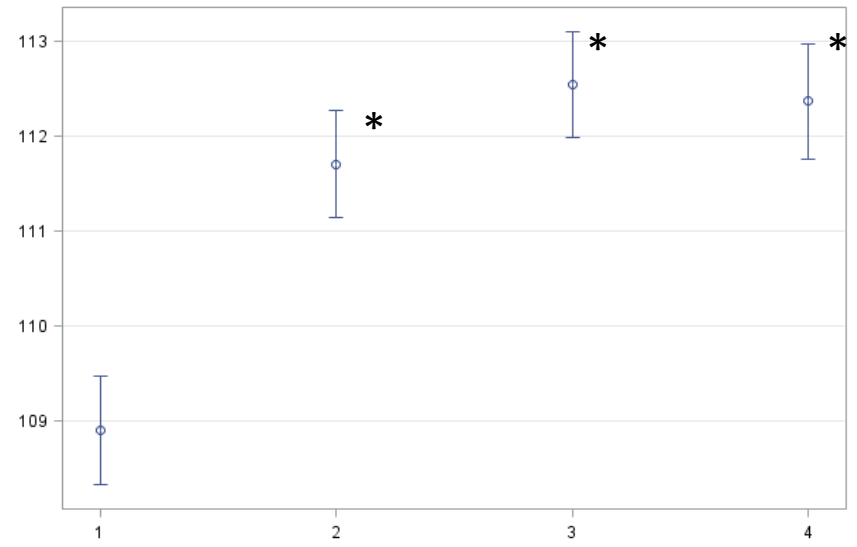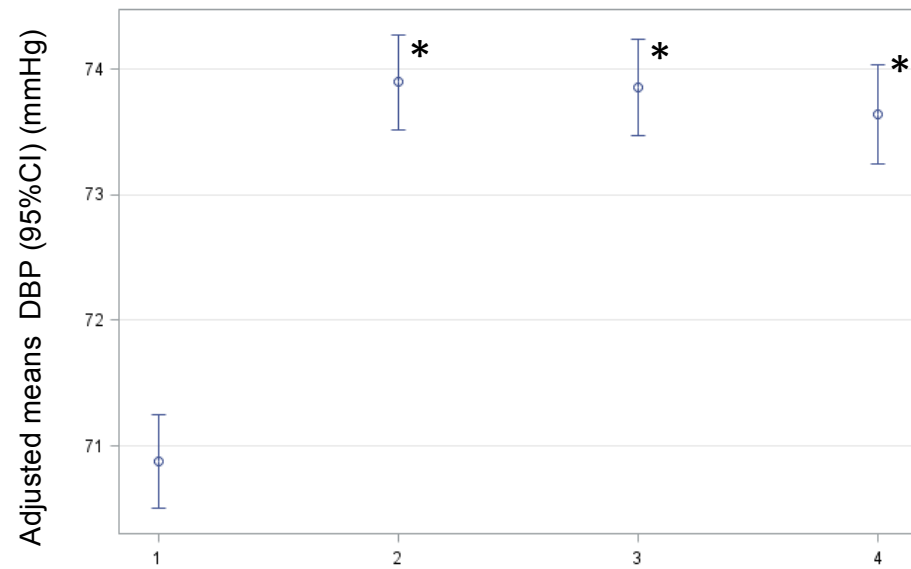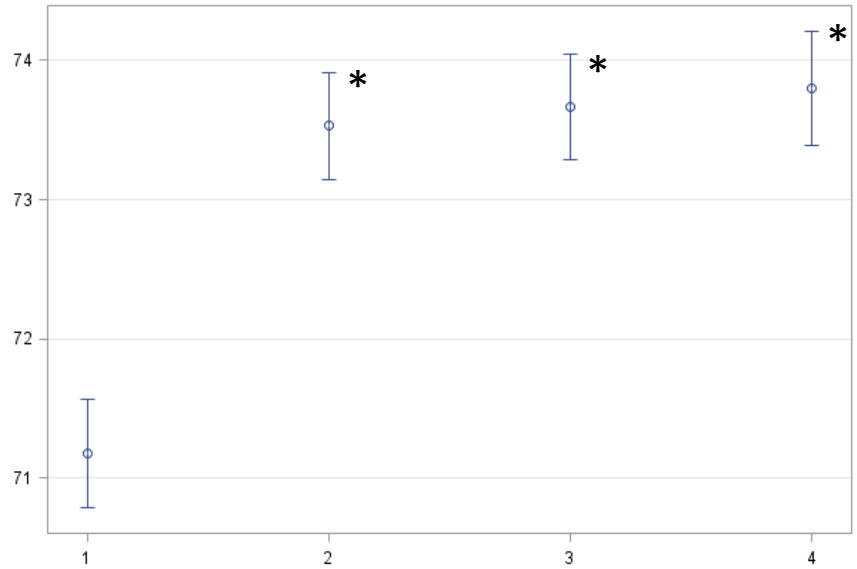

Baseline water arsenic by quartiles

Baseline urinary creatinine-adjusted arsenic by quartiles

Figure S1. Adjusted means of blood pressure at the third visit by quartiles of baseline arsenic in water or urine. \*  $P < .001$  when compared with reference group (Q1). Model was adjusted for baseline age, sex, baseline BMI, baseline smoking status, baseline educational status and history of diabetes.
